# Supplementary material for: Distinct T cell signatures are associated with Staphylococcus aureus skin infection in pediatric atopic dermatitis
Source: JCI journal article supplement (doi:10.1172/jci.insight.178789), 2024-04-11
Supplement: sd1 [file 1]

## Supplemental Figure 1:

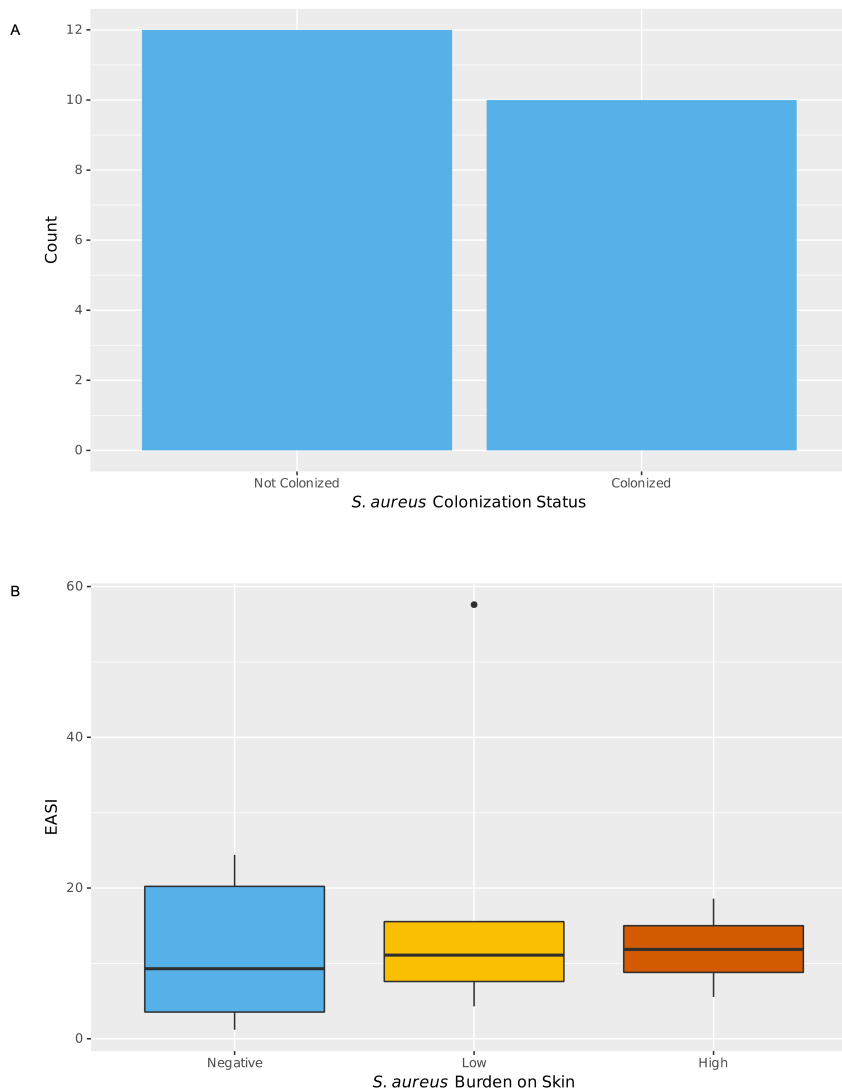

### ***S. aureus* colonization status of AD patients on systemic immunomodulatory treatment and burden of *S. aureus* skin colonization in *AD<sub>control</sub>* patients on systemic immunomodulatory therapy**

Subjects on systemic immunomodulatory treatment for management of AD ( $n = 22$ ) in the total study cohort were grouped according to *S. aureus* skin colonization status (A). The number of patients is indicated on the x-axis and colonization status is shown on the y-axis. There was no significant correlation between colonization status systemic immunomodulatory treatment as assessed using the chi-squared test. ( $p$  value = 0.08). Colonized and on systemic immunomodulation:  $n = 10$ . Not colonized and on systemic immunomodulation:  $n = 12$

Subjects on systemic immunomodulatory therapy within the *AD<sub>control</sub>* cohort ( $n = 21$ ) were grouped according to their burden of *S. aureus* skin colonization: negative ( $n=12$ ), low ( $n=5$ ) and high ( $n=4$ ), to determine if those with high colonization represented therapeutic non-responders (B). The burden of *S. aureus* colonization is indicated on the x-axis and EASI score is indicated on the y-axis. There was no correlation between EASI score and the burden of *S. aureus* skin colonization using the t-test of Spearman correlation in *AD<sub>control</sub>* subjects on systemic immunomodulatory therapy ( $p$  value = 0.63).

**Supplemental Figure 2: Gating for circulating T cell populations**

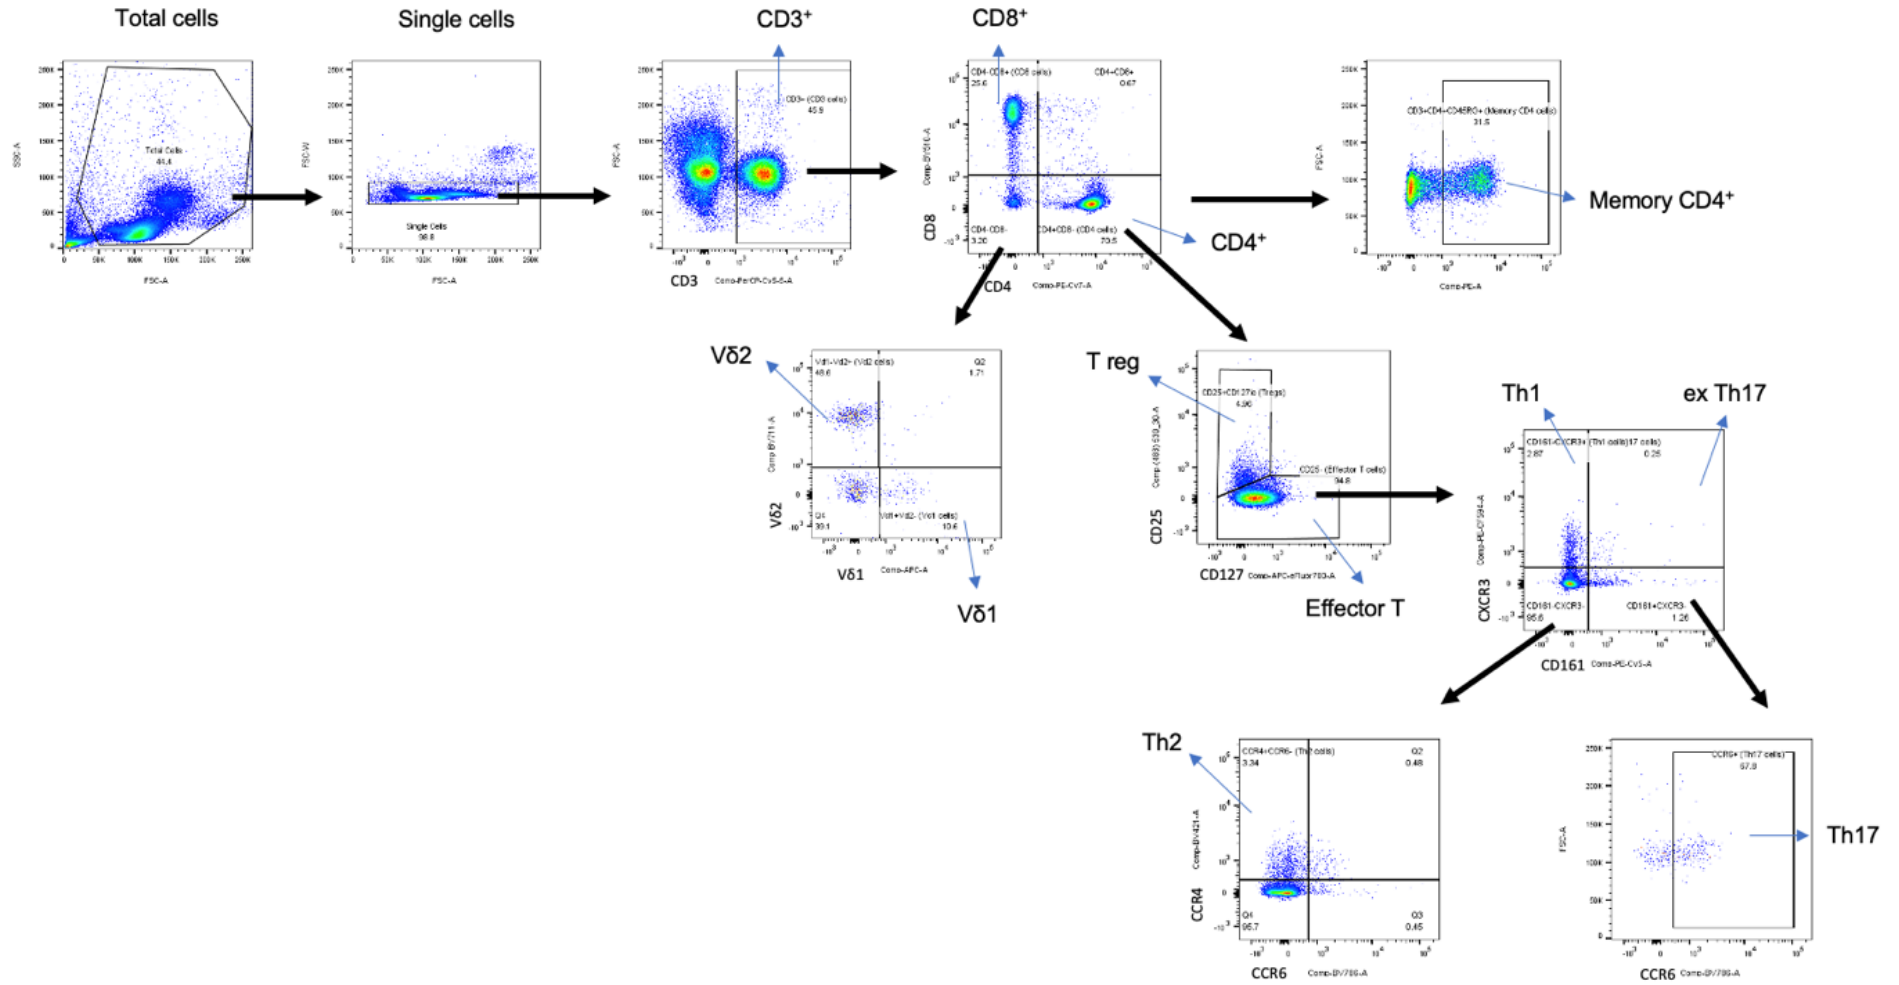

Supplemental Figure 3: Gating for CLA<sup>±</sup> *S. aureus* antigen-specific memory responses

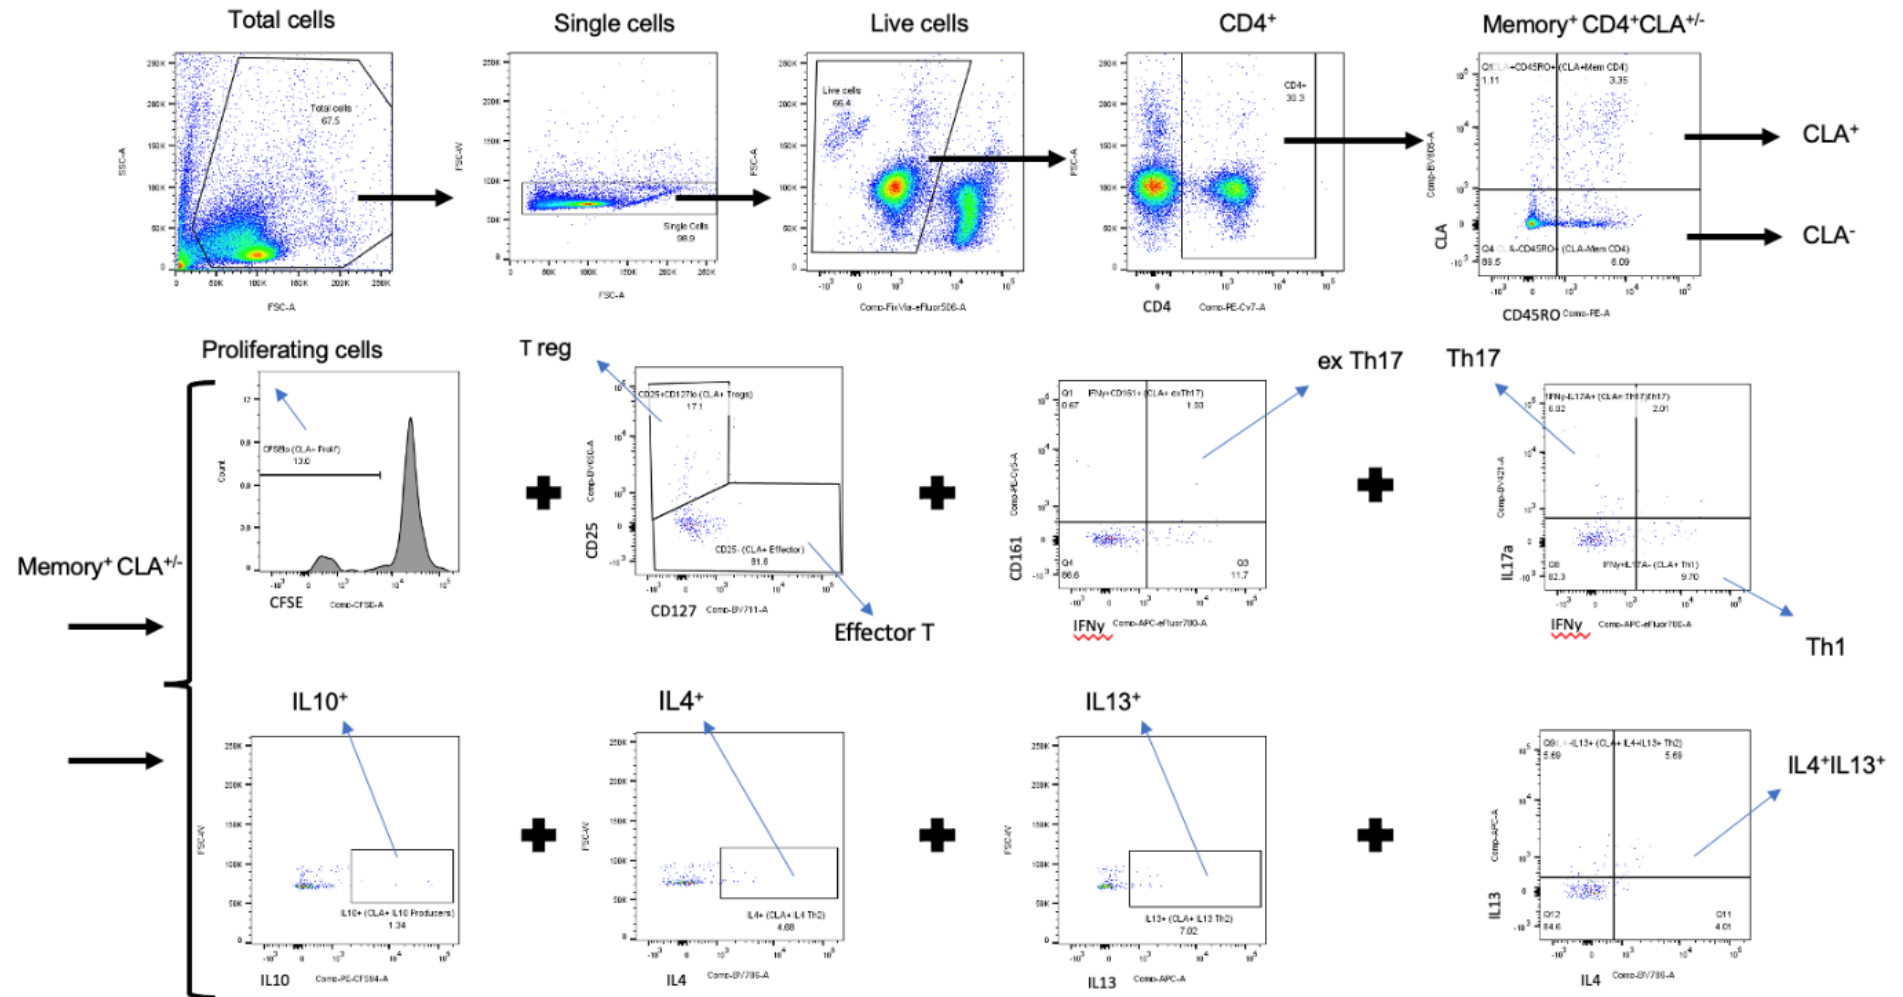

Supplemental Figure 4: Gating for total *S. aureus* antigen-specific memory responses

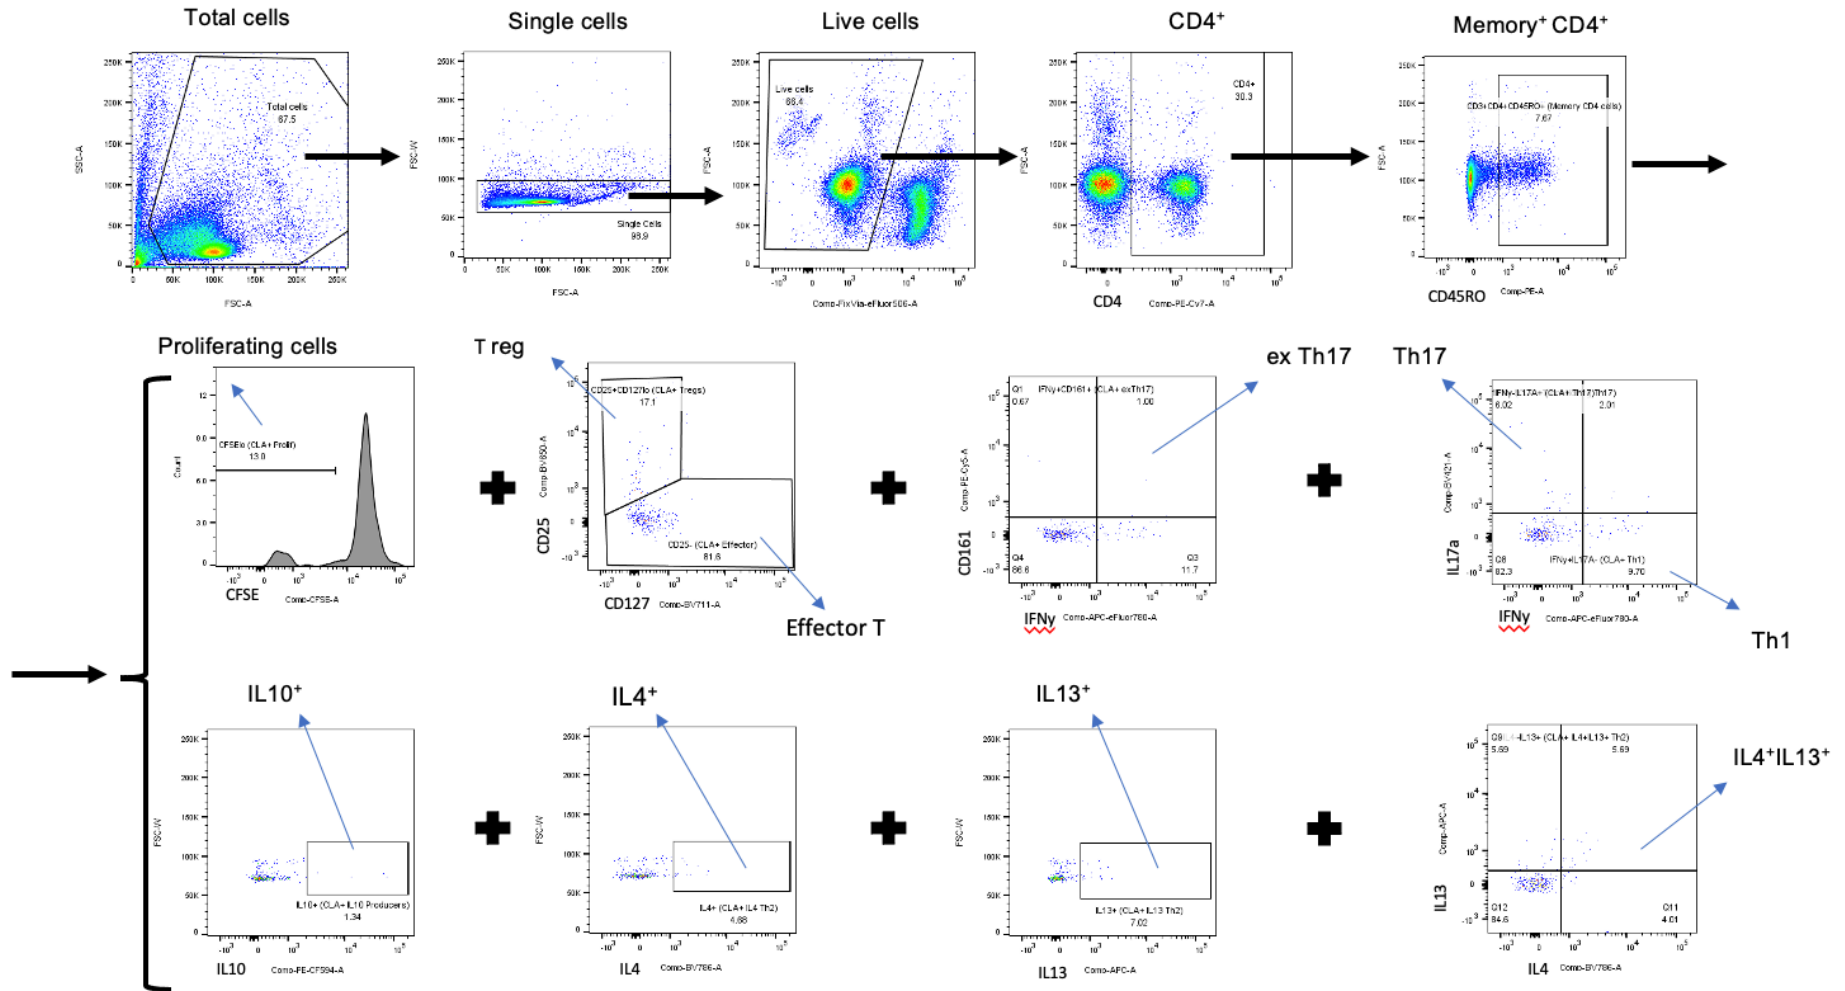

## Supplemental Data 5: MIATA / MIANKA Checklist

| #                                               | Required                            | If available             | Optional                            | MIANKA & MIATA Sub-Modules                                                               |
|-------------------------------------------------|-------------------------------------|--------------------------|-------------------------------------|------------------------------------------------------------------------------------------|
| <b>Module 1 - Sample</b>                        |                                     |                          |                                     |                                                                                          |
| <b>Module 1A - Donor</b>                        |                                     |                          |                                     |                                                                                          |
| 1.1                                             | <input checked="" type="checkbox"/> | <input type="checkbox"/> | <input type="checkbox"/>            | Essential donor info                                                                     |
| <b>Module 1B Source</b>                         |                                     |                          |                                     |                                                                                          |
| 1.2                                             | <input checked="" type="checkbox"/> | <input type="checkbox"/> | <input type="checkbox"/>            | Source of cell material                                                                  |
| 1.3                                             | <input checked="" type="checkbox"/> | <input type="checkbox"/> | <input type="checkbox"/>            | Collection methodology                                                                   |
| 1.4                                             | <input type="checkbox"/>            | <input type="checkbox"/> | <input checked="" type="checkbox"/> | anti-coagulant, if available                                                             |
| 1.5                                             | <input type="checkbox"/>            | <input type="checkbox"/> | <input checked="" type="checkbox"/> | Transportation/storage conditions for unprocessed samples, if available                  |
| 1.6                                             | <input checked="" type="checkbox"/> | <input type="checkbox"/> | <input type="checkbox"/>            | Cell processing methodology                                                              |
| 1.7                                             | <input type="checkbox"/>            | <input type="checkbox"/> | <input type="checkbox"/>            | Median time and ranges from sample collection until end of cell processing, if available |
| 1.8                                             | <input type="checkbox"/>            | <input type="checkbox"/> | <input type="checkbox"/>            | Cut-offs, if used                                                                        |
| <b>Module 1C - Cryopreservation and Storage</b> |                                     |                          |                                     |                                                                                          |
| 1.9                                             | <input checked="" type="checkbox"/> | <input type="checkbox"/> | <input type="checkbox"/>            | Fresh or cryopreserved                                                                   |
| 1.10                                            | <input type="checkbox"/>            | <input type="checkbox"/> | <input type="checkbox"/>            | If cryopreserved devices used                                                            |
| 1.11                                            | <input type="checkbox"/>            | <input type="checkbox"/> | <input type="checkbox"/>            | freezing process                                                                         |
| 1.12                                            | <input type="checkbox"/>            | <input type="checkbox"/> | <input type="checkbox"/>            | medium used for freezing                                                                 |
| 1.13                                            | <input type="checkbox"/>            | <input type="checkbox"/> | <input type="checkbox"/>            | Median time and temperature for each transportation and storage step, if available       |
| 1.14                                            | <input type="checkbox"/>            | <input type="checkbox"/> | <input type="checkbox"/>            | Cut-offs, if used                                                                        |
| <b>Module 1D - Cell Counting</b>                |                                     |                          |                                     |                                                                                          |
| 1.15                                            | <input checked="" type="checkbox"/> | <input type="checkbox"/> | <input type="checkbox"/>            | Median cell yield and viability (where available)                                        |
| 1.16                                            | <input type="checkbox"/>            | <input type="checkbox"/> | <input type="checkbox"/>            | before freezing                                                                          |
| 1.17                                            | <input type="checkbox"/>            | <input type="checkbox"/> | <input type="checkbox"/>            | after thawing                                                                            |
| 1.18                                            | <input type="checkbox"/>            | <input type="checkbox"/> | <input type="checkbox"/>            | after overnight resting                                                                  |
| 1.19                                            | <input type="checkbox"/>            | <input type="checkbox"/> | <input type="checkbox"/>            | Cut-offs, if used                                                                        |
| 1.20                                            | <input checked="" type="checkbox"/> | <input type="checkbox"/> | <input type="checkbox"/>            | Cell counting methodology                                                                |
| 1.21                                            | <input type="checkbox"/>            | <input type="checkbox"/> | <input type="checkbox"/>            | Optional: Additional assessments                                                         |

|                                                    |                                     |                                     |                          |                                                                                 |
|----------------------------------------------------|-------------------------------------|-------------------------------------|--------------------------|---------------------------------------------------------------------------------|
| <b>Module 2 - Assay</b>                            |                                     |                                     |                          |                                                                                 |
| <b>Module 2A - Medium/serum</b>                    |                                     |                                     |                          |                                                                                 |
| 2.1                                                | <input checked="" type="checkbox"/> | <input type="checkbox"/>            | <input type="checkbox"/> | Medium/(serum) details                                                          |
| 2.2                                                | <input checked="" type="checkbox"/> | <input type="checkbox"/>            | <input type="checkbox"/> | Pretesting info                                                                 |
| <b>Module 2B - Assay</b>                           |                                     |                                     |                          |                                                                                 |
| 2.3                                                | <input type="checkbox"/>            | <input type="checkbox"/>            | <input type="checkbox"/> | Treatment procedures of cells prior to assay, if applicable                     |
| 2.4                                                | <input checked="" type="checkbox"/> | <input type="checkbox"/>            | <input type="checkbox"/> | Sufficient assay details                                                        |
| <b>Module 2C - Controls</b>                        |                                     |                                     |                          |                                                                                 |
| 2.5                                                | <input checked="" type="checkbox"/> | <input type="checkbox"/>            | <input type="checkbox"/> | Internal assay controls                                                         |
| 2.6                                                | <input type="checkbox"/>            | <input type="checkbox"/>            | <input type="checkbox"/> | Acceptance criteria, if available                                               |
| 2.7                                                | <input type="checkbox"/>            | <input type="checkbox"/>            | <input type="checkbox"/> | External reference samples, if used                                             |
| 2.8                                                | <input type="checkbox"/>            | <input type="checkbox"/>            | <input type="checkbox"/> | Assay acceptance criteria, if available                                         |
| <b>Module 3 - Data Acquisition</b>                 |                                     |                                     |                          |                                                                                 |
| <b>Module 3A - Equipment and software</b>          |                                     |                                     |                          |                                                                                 |
| 3.1                                                | <input checked="" type="checkbox"/> | <input type="checkbox"/>            | <input type="checkbox"/> | Equipment and software version                                                  |
| 3.2                                                | <input type="checkbox"/>            | <input type="checkbox"/>            | <input type="checkbox"/> | Basic equipment settings, if available                                          |
| <b>Module 3B - Acquisition Strategy and Gating</b> |                                     |                                     |                          |                                                                                 |
| 3.3                                                | <input checked="" type="checkbox"/> | <input type="checkbox"/>            | <input type="checkbox"/> | Detailed gating strategy or strategy for establishing spot detection parameters |
| 3.4                                                | <input checked="" type="checkbox"/> | <input type="checkbox"/>            | <input type="checkbox"/> | Representative data set                                                         |
| 3.5                                                | <input type="checkbox"/>            | <input type="checkbox"/>            | <input type="checkbox"/> | Mean, median, ranges of event counts for relevant populations, if available     |
| 3.6                                                | <input type="checkbox"/>            | <input type="checkbox"/>            | <input type="checkbox"/> | Optional: Unusual strategies explained                                          |
| 3.7                                                | <input type="checkbox"/>            | <input type="checkbox"/>            | <input type="checkbox"/> | Optional: Review of raw data                                                    |
| <b>Module 4 - Results</b>                          |                                     |                                     |                          |                                                                                 |
| <b>Module 4A - Raw data</b>                        |                                     |                                     |                          |                                                                                 |
| 4.1                                                | <input type="checkbox"/>            | <input type="checkbox"/>            | <input type="checkbox"/> | Background and ag-specific reactivity levels, if available                      |
| 4.2                                                | <input type="checkbox"/>            | <input type="checkbox"/>            | <input type="checkbox"/> | Cut-off specifications and # of tests OOS, if available                         |
| 4.3                                                | <input checked="" type="checkbox"/> | <input type="checkbox"/>            | <input type="checkbox"/> | Accessibility of raw data addressed?                                            |
| <b>Module 4B - Response determination</b>          |                                     |                                     |                          |                                                                                 |
| 4.4                                                | <input checked="" type="checkbox"/> | <input type="checkbox"/>            | <input type="checkbox"/> | Definition of positive reactivity (above background) including tests applied    |
| 4.5                                                | <input type="checkbox"/>            | <input type="checkbox"/>            | <input type="checkbox"/> | Parameters, software and version used for response determination, if applicable |
| 4.6                                                | <input checked="" type="checkbox"/> | <input type="checkbox"/>            | <input type="checkbox"/> | Response definition predefined or post-hoc?                                     |
| 4.7                                                | <input type="checkbox"/>            | <input type="checkbox"/>            | <input type="checkbox"/> | Definition of response induced by treatment, if applicable                      |
| 4.8                                                | <input type="checkbox"/>            | <input type="checkbox"/>            | <input type="checkbox"/> | Any data excluded and why, if applicable?                                       |
| 4.9                                                | <input type="checkbox"/>            | <input type="checkbox"/>            | <input type="checkbox"/> | Optional: Why test was used                                                     |
| <b>Module 5</b>                                    |                                     |                                     |                          |                                                                                 |
| <b>Module 5A - General Lab Operation</b>           |                                     |                                     |                          |                                                                                 |
| 5.1                                                | <input checked="" type="checkbox"/> | <input type="checkbox"/>            | <input type="checkbox"/> | Guidance of lab operations                                                      |
| 5.2                                                | <input type="checkbox"/>            | <input checked="" type="checkbox"/> | <input type="checkbox"/> | Laboratory accreditations and certifications, if available                      |
| 5.3                                                | <input type="checkbox"/>            | <input type="checkbox"/>            | <input type="checkbox"/> | Optional: Details on audits                                                     |
| <b>Module 5B - Standardization</b>                 |                                     |                                     |                          |                                                                                 |
| 5.4                                                | <input checked="" type="checkbox"/> | <input type="checkbox"/>            | <input type="checkbox"/> | Status of protocols                                                             |
| <b>Module 5C - Qualification/Validation</b>        |                                     |                                     |                          |                                                                                 |
| 5.5                                                | <input checked="" type="checkbox"/> | <input type="checkbox"/>            | <input type="checkbox"/> | Status of assays                                                                |
| 5.6                                                | <input type="checkbox"/>            | <input type="checkbox"/>            | <input type="checkbox"/> | Optional: Specific performance criteria                                         |

**Supplemental Data 6: Link to statistical coding**

[https://github.com/DanDempsey/AD\\_Study\\_Code](https://github.com/DanDempsey/AD_Study_Code)
